# Supplementary material for: Evaluation of Anthelmintic and Anti-Inflammatory Activity of 1,2,4-Triazole Derivatives
Source: MDPI journal article supplement (doi:10.3390/molecules27144488), 2022-07-13

Supplementary material

for publication

## Evaluation of anthelmintic and anti-inflammatory activity of 1,2,4-triazole derivatives

Renata Paprocka <sup>^1,\*</sup>, Przemysław Kołodziej <sup>^2,\*</sup>, Małgorzata Wiese-Szadkowska <sup>^3</sup>, Anna Helmin-Basa <sup>3</sup> and Anna Bogucka-Kocka <sup>2</sup>

<sup>1</sup> Nicolaus Copernicus University in Toruń, Collegium Medicum in Bydgoszcz, Faculty of Pharmacy, Department of Organic Chemistry, Jurasza Str. 2, 85-089 Bydgoszcz, Poland; renata.bursa@cm.umk.pl

<sup>2</sup> Medical University in Lublin, Faculty of Pharmacy, Department of Biology and Genetics, Chodźki 4A, 20-093 Lublin, Poland; przemyslawkolodziej@umlub.pl (P.K), anna.bogucka-kocka@umlub.pl (A.B.-K.)

<sup>3</sup> Nicolaus Copernicus University in Toruń, Collegium Medicum in Bydgoszcz, Faculty of Pharmacy, Department of Immunology, M. Curie-Skłodowska Str. 9, 85-094 Bydgoszcz, Poland; mwiese@cm.umk.pl (M.W.-S.), a.helmin-basa@cm.umk.pl (A.H.-B.)

\* Correspondence: renata.bursa@cm.umk.pl, przemyslawkolodziej@umlub.pl

<sup>^</sup> These authors contributed equally to this work.

### Characteristics of new compounds **12** and **19-22**

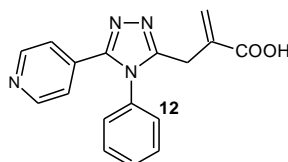

**2-((4-(4-phenyl)-5-(pyridin-4-yl)-4H-1,2,4-triazol-3-yl)methyl)acrylic acid (12).** Yield: 66%, m.p. 178-180°C. <sup>1</sup>H NMR (400 MHz, DMSO-d<sub>6</sub>): δ [ppm] = 3.53 (s, 2 H), 5.56 (s, 1 H); 6.11 (s, 1 H), 7.30 (m, 3 H), 7.45 (d, 3 H, *J* = 4.2 Hz), 7.87 (t, 1 H, *J* = 7.7 Hz), 7.95 (d, 1 H, *J* = 7.7 Hz), 8.27 (d, 1 H, *J* = 4.2 Hz), 12.57 (s, 1 H, COOH). <sup>13</sup>C NMR (75 MHz, DMSO-d<sub>6</sub>): δ [ppm] = 28.0, 124.2, 124.7, 127.6, 127.9, 129.6, 129.8, 135.5, 136.5, 137.6, 147.2, 149.4, 153.0, 154.4, 167.5. HR-MS *m/z* 307.1194 [*M*<sup>+</sup> + 1] (calculated for C<sub>17</sub>H<sub>15</sub>N<sub>4</sub>O<sub>2</sub>: 307.1195). Elem. anal. for C<sub>17</sub>H<sub>14</sub>N<sub>4</sub>O<sub>2</sub> calculated: C, 66.66; H, 4.61; N, 18.29%; found C, 66.37; H, 4.83; N, 17.91%.

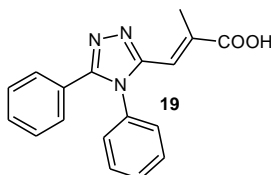

**(E)-(4,5-diphenyl-4H-1,2,4-triazol-3-yl)-2-methylacrylic acid (19).** Yield: 46.67%, m.p. 235-238°C.  $^1\text{H}$  NMR (400 MHz, DMSO- $d_6$ ):  $\delta$  [ppm] = 2.43 (d, 3 H,  $J$  = 1.2 Hz), 6.85 (d, 1 H,  $J$  = 1.2 Hz), 7.33-7.44 (m, 5 H), 7.45-7.50 (m, 2 H), 7.56-7.62 (m, 3 H), 12.82 (sb, 1 H, COOH).  $^{13}\text{C}$  NMR (100 MHz, DMSO- $d_6$ ):  $\delta$  [ppm] = 15.6, 119.5, 127.0, 128.6 (2x), 128.7 (2x), 129.0 (2x), 130.3, 130.6 (2x), 130.7, 134.3, 136.0, 152.3, 153.8, 168.7. HR-MS  $m/z$  306.1240 [ $M^+$  + 1] (calculated for  $\text{C}_{18}\text{H}_{16}\text{N}_3\text{O}_2$ : 306.1243). Elem. anal. for  $\text{C}_{18}\text{H}_{15}\text{N}_3\text{O}_2$  calculated: C, 67.66; H, 5.64; N, 12.46%; found C, 67.94; H, 5.72; N, 12.59%.

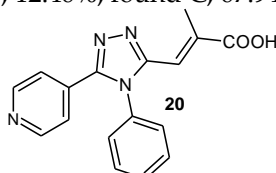

**(E)-2-methyl-3-(4-phenyl-5-(pyridin-4-yl)-4H-1,2,4-triazol-3-yl)acrylic acid (20).** Yield: 82.35%, m.p. 230-232°C.  $^1\text{H}$  NMR (400 MHz, DMSO- $d_6$ ):  $\delta$  [ppm] = 2.43 (d, 3 H,  $J$  = 1.6 Hz), 6.85 (d, 1 H,  $J$  = 1.6 Hz), 7.36-7.41 (m, 3 H), 7.50-7.56 (m, 3 H), 7.93 (t, 1 H,  $J$  = 7.6 Hz), 8.05 (d, 1 H,  $J$  = 7.6 Hz), 8.32 (d, 1 H,  $J$  = 4.2 Hz), 12.85 (sb, 1 H, COOH).  $^{13}\text{C}$  NMR (100 MHz, DMSO- $d_6$ ):  $\delta$  [ppm] = 15.7, 119.4, 124.5, 125.0, 128.3 (2x), 129.9 (2x), 130.0, 135.0, 136.5, 137.7, 146.7, 149.5, 152.8, 152.9, 168.7. HR-MS  $m/z$  307.1194 [ $M^+$  + 1] (calculated for  $\text{C}_{17}\text{H}_{15}\text{N}_4\text{O}_2$ : 307.1195). Elem. anal. for  $\text{C}_{17}\text{H}_{14}\text{N}_4\text{O}_2$  calculated: C, 66.66; H, 4.61; N, 18.29%; found C, 66.30; H, 4.97; N, 17.91%.

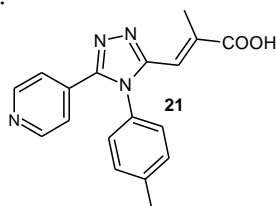

**(E)-2-methyl-3-(5-(pyridin-4-yl)-4-p-tolyl-4H-1,2,4-triazol-3-yl)acrylic acid (21).** Yield: 80.95%, m.p. 252-254°C.  $^1\text{H}$  NMR (400 MHz, DMSO- $d_6$ ):  $\delta$  [ppm] = 2.43 (s, 6 H), 6.86 (d, 1 H,  $J$  = 1.44 Hz), 7.34 (dd, 2 H,  $J_1$  = 4.4 Hz,  $J_2$  = 1.6 Hz), 7.42 (d, 4 H,  $J$  = 3.2 Hz), 8.59 (dd, 2 H,  $J_1$  = 4.4 Hz,  $J_2$  = 1.6 Hz), 12.87 (sb, 1 H, COOH).  $^{13}\text{C}$  NMR (100 MHz, DMSO- $d_6$ ):  $\delta$  [ppm] = 15.7, 21.3, 119.1, 122.3 (2x), 128.1 (2x), 131.2 (2x), 131.2, 134.4, 136.7, 140.9, 150.6 (2x), 151.7, 153.2, 168.7. HR-MS  $m/z$  321.1349 [ $M^+$  + 1] (calculated for  $\text{C}_{18}\text{H}_{17}\text{N}_4\text{O}_2$ : 321.1352). Elem. anal. for  $\text{C}_{18}\text{H}_{16}\text{N}_4\text{O}_2 \cdot 1/2 \text{C}_2\text{H}_5\text{OH}$  calculated: C, 66.52; H, 5.54; N, 16.39%; found C, 66.13; H, 5.23; N, 16.31%.

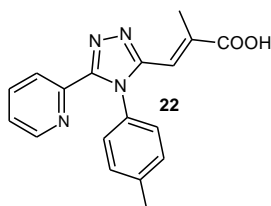

**(E)-2-methyl-3-(5-(pyridin-2-yl)-4-p-tolyl-4H-1,2,4-triazol-3-yl)acrylic acid (22).** Yield: 52.78%, m.p. 227-229°C.  $^1\text{H}$  NMR (700 MHz, DMSO- $d_6$ ):  $\delta$  [ppm] = 2.38 (s, 3 H), 2.41 (d, 3 H,  $J$  = 1.68 Hz), 6.84 (d, 1 H,  $J$  = 1.68 Hz), 7.25 (d, 2 H,  $J$  = 7.7 Hz), 7.31 (d, 2 H,  $J$  = 7.7 Hz), 7.36-7.39 (m, 1 H), 7.91 (t, 1 H,  $J$  = 7.7 Hz), 8.00 (d, 1 H,  $J$  = 7.7 Hz), 8.35 (d, 1 H,  $J$  = 7.7 Hz), 12.79 (sb, 1 H, COOH).  $^{13}\text{C}$  NMR (175 MHz, DMSO- $d_6$ ):  $\delta$  [ppm] = 15.7, 21.2, 119.5, 124.6, 124.9, 128.0 (2x), 130.3 (2x), 132.3, 136.4, 137.6, 139.5, 146.8, 149.6, 152.9, 153.0, 168.7. HR-MS  $m/z$  321.1354 [ $M^+$  + 1] (calculated for  $\text{C}_{18}\text{H}_{17}\text{N}_4\text{O}_2$ : 321.1352). Elem. anal. for  $\text{C}_{18}\text{H}_{16}\text{N}_4\text{O}_2$  calculated: C, 67.49; H, 5.03; N, 17.49%; found C, 67.37; H, 5.11; N, 17.43%.

Figure S1.  $^1\text{H}$  NMR spectrum of compound **12** (in  $\text{DMSO-d}_6$ )

SpinWorks 4:  $^1\text{H}$  NMR spectrum of 12  
DMSO

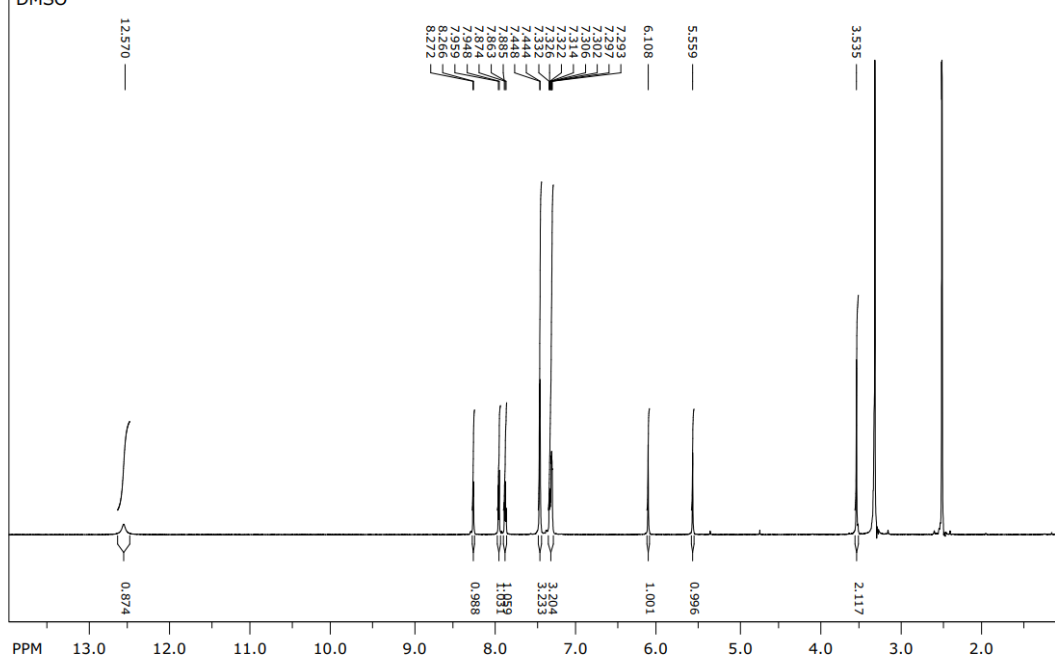

file: ...\\moje badania\\widma\\1868 zw180\\fid exp: <zg30>  
transmitter freq.: 700.275602 MHz  
time domain size: 169170 points  
width: 14097.74 Hz = 20.1317 ppm = 0.083335 Hz/pt  
number of scans: 8

freq. of 0 ppm: 700.270026 MHz  
processed size: 16384 complex points  
LB: 0.000 GF: 0.0000  
Hz/cm: 364.391 ppm/cm: 0.52035

SpinWorks 4:  $^1\text{H}$  NMR spectrum of 12  
DMSO

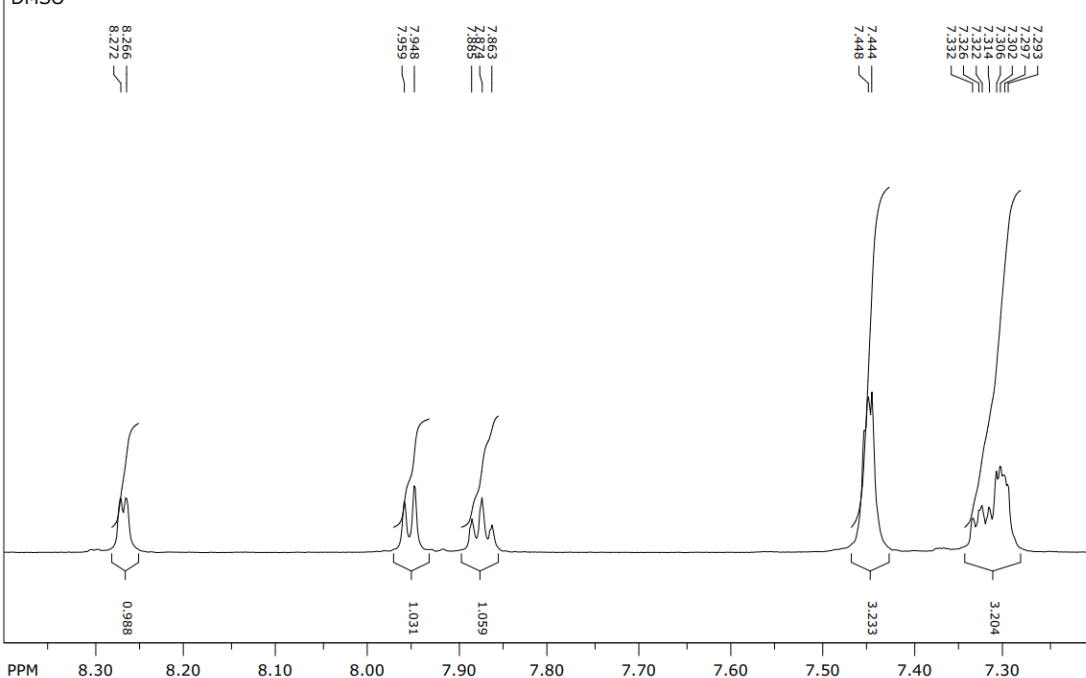

file: ...\\moje badania\\widma\\1868 zw180\\fid exp: <zg30>  
transmitter freq.: 700.275602 MHz  
time domain size: 169170 points  
width: 14097.74 Hz = 20.1317 ppm = 0.083335 Hz/pt  
number of scans: 8

freq. of 0 ppm: 700.270026 MHz  
processed size: 16384 complex points  
LB: 0.000 GF: 0.0000  
Hz/cm: 33.705 ppm/cm: 0.04813

Figure S2.  $^1\text{H}$  NMR spectrum of compound **19** (in DMSO- $d_6$ )

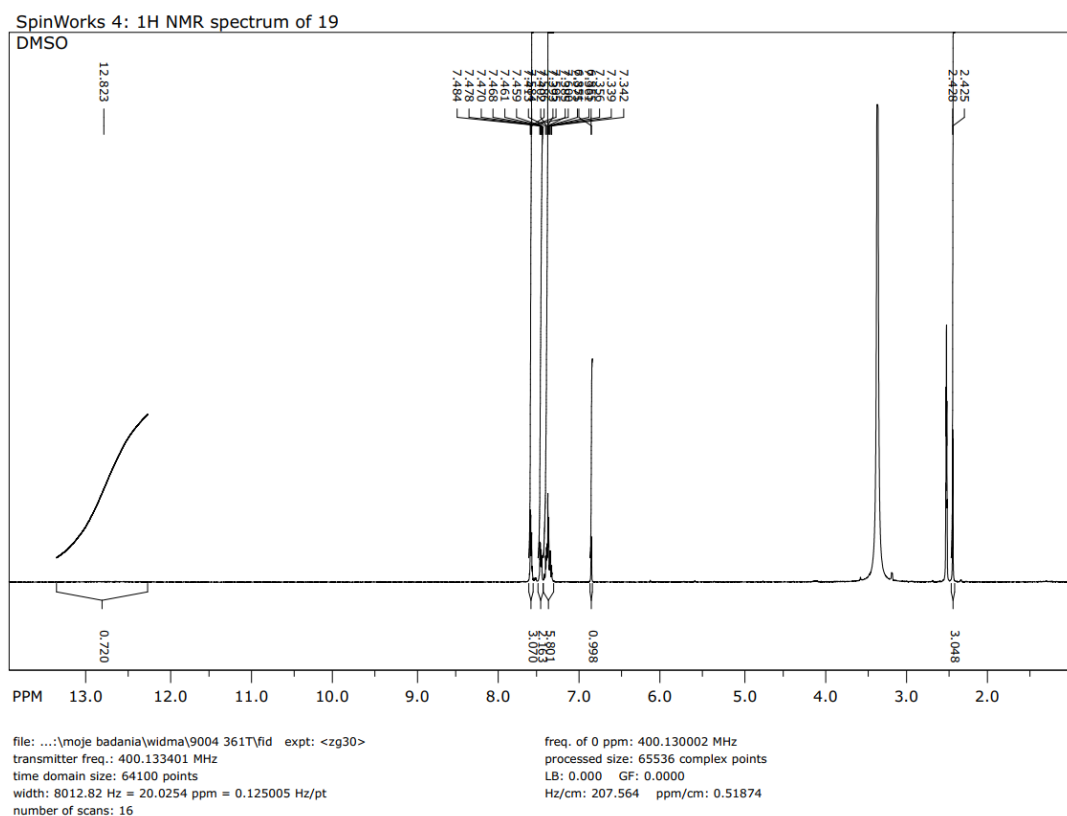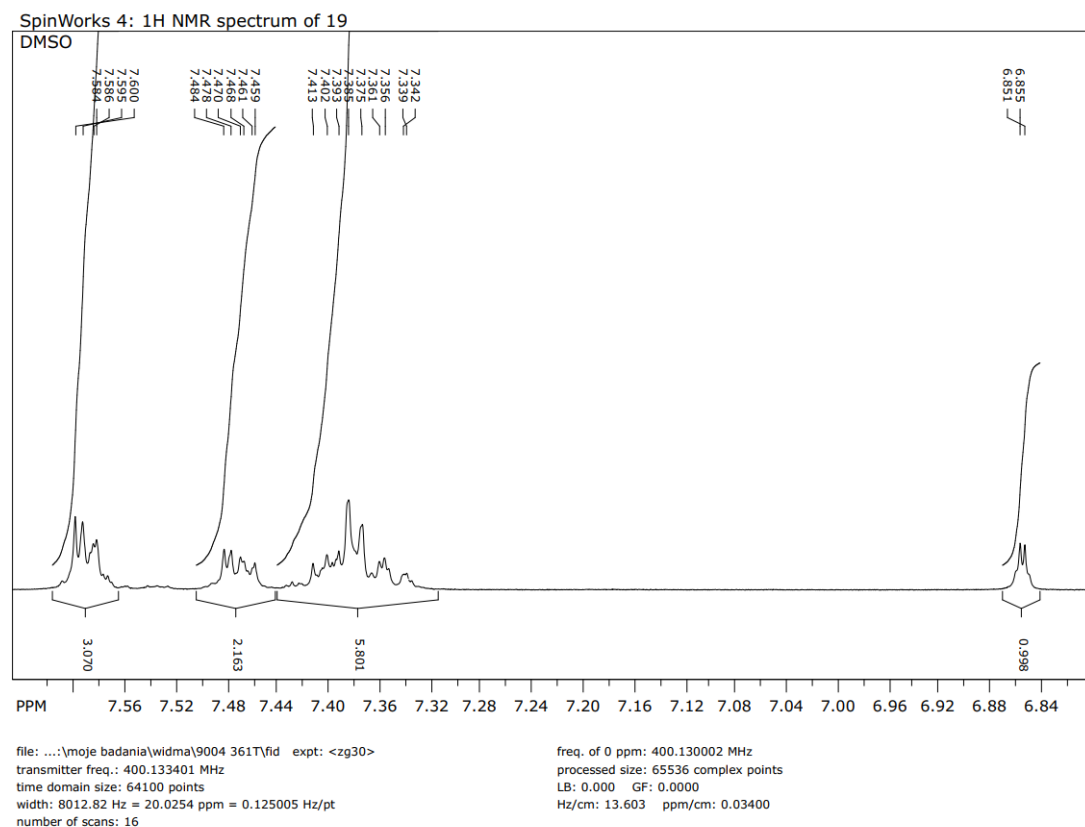

Figure S3.  $^1\text{H}$  NMR spectrum of compound **20** (in  $\text{DMSO-d}_6$ )

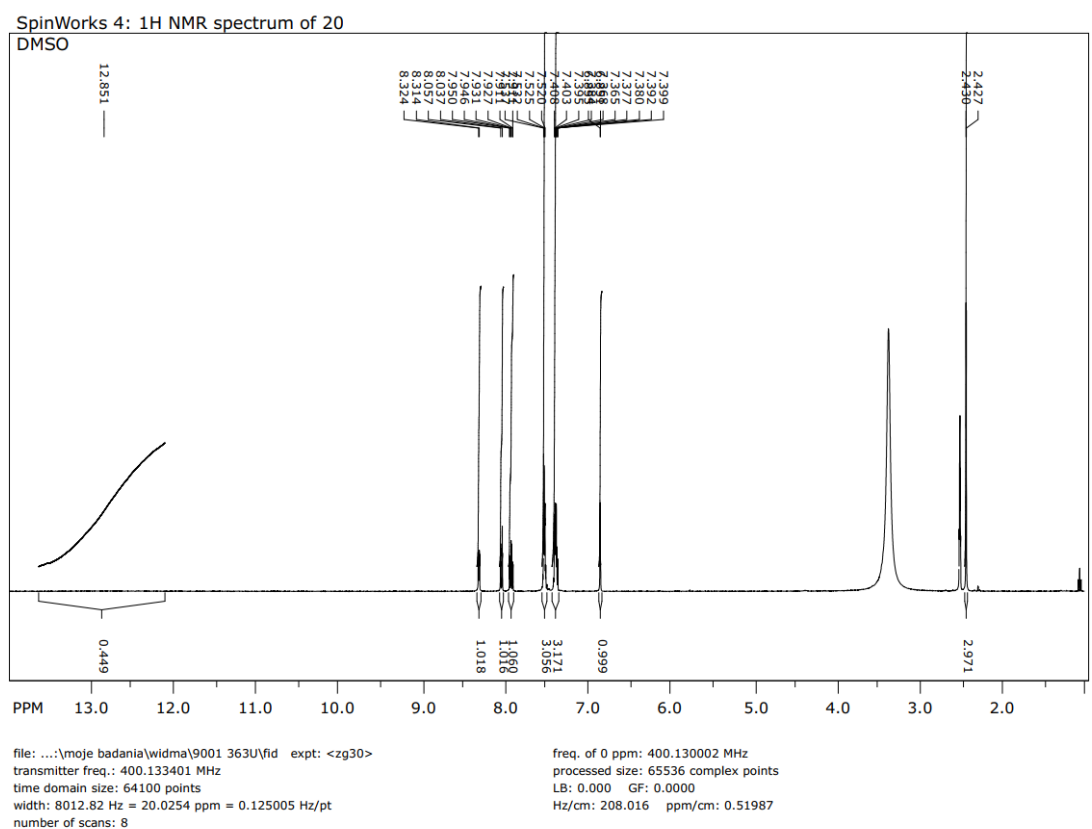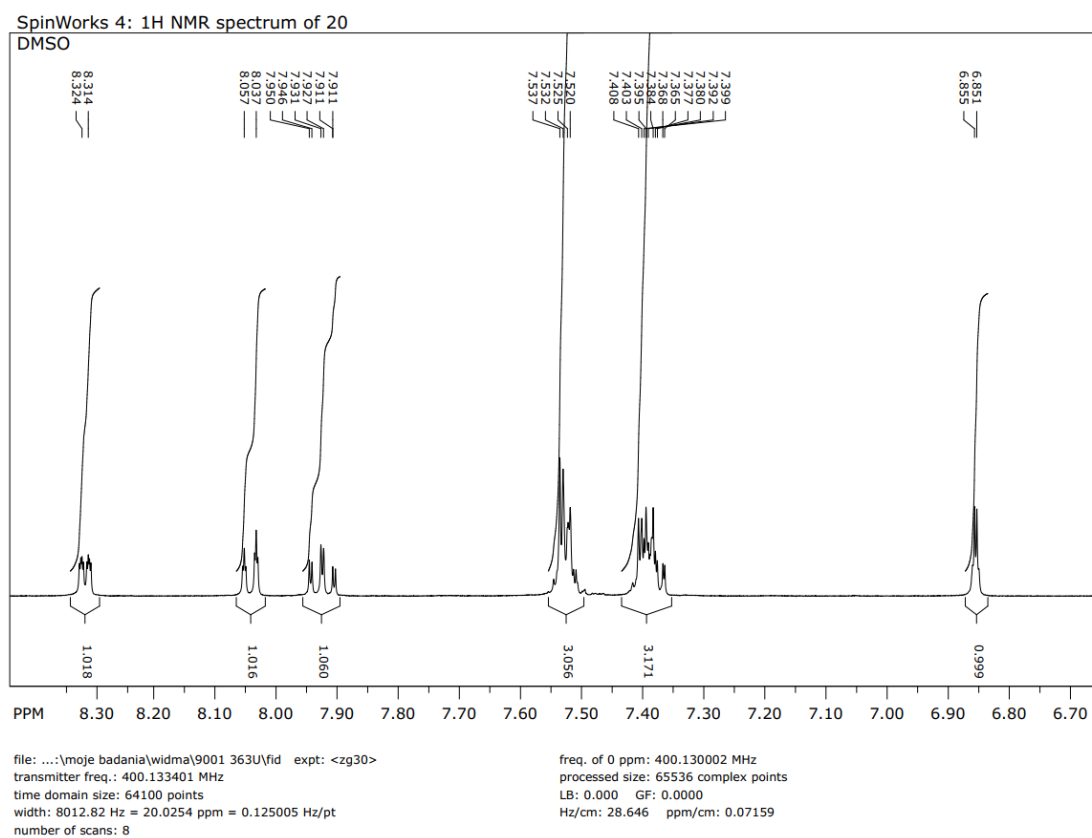

Figure S4.  $^1\text{H}$  NMR spectrum of compound **21** (in  $\text{DMSO-d}_6$ )

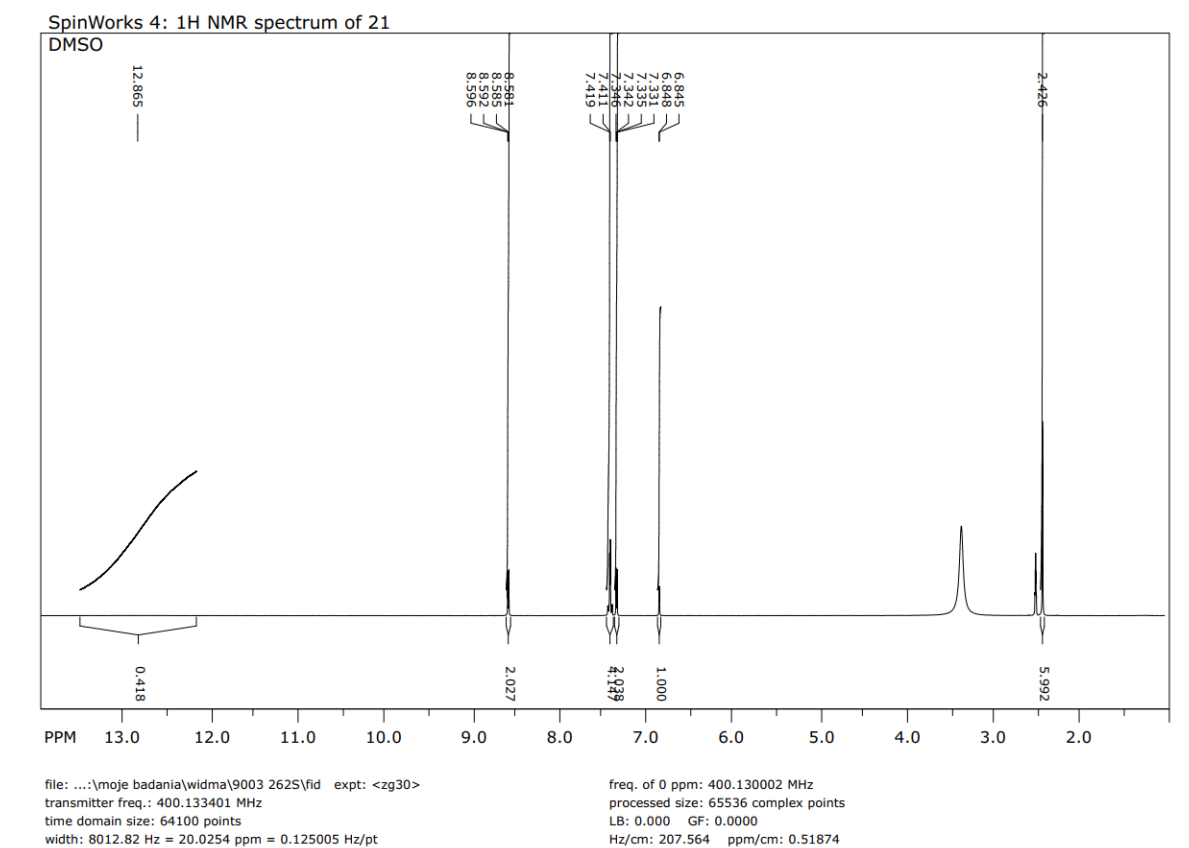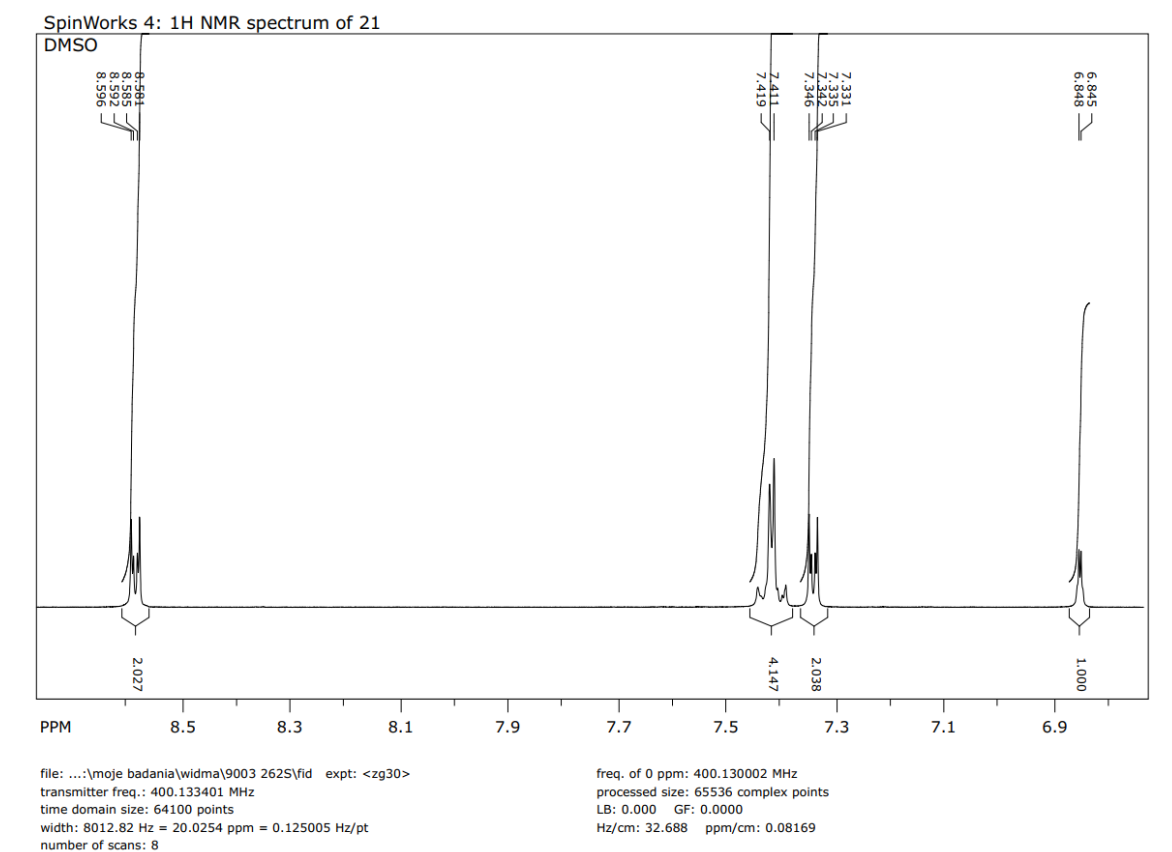

Figure S5.  $^1\text{H}$  NMR of compound **22** (in  $\text{DMSO-d}_6$ )

SpinWorks 4:  $^1\text{H}$  NMR spectrum of 22

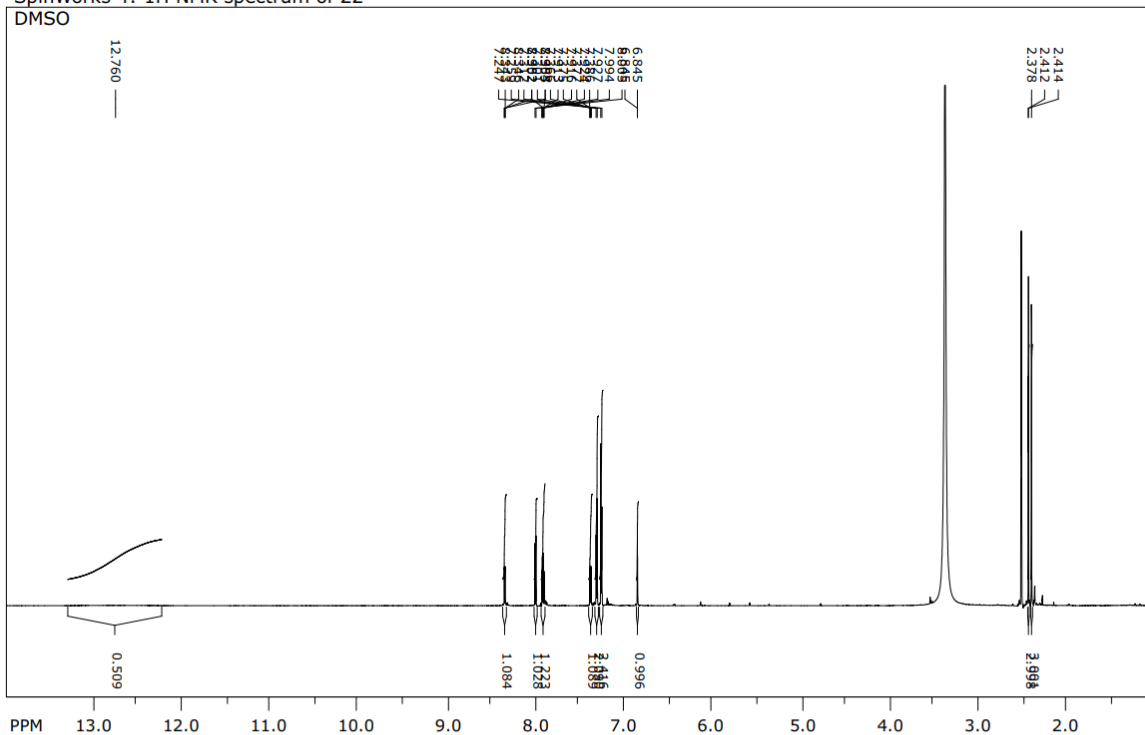

Figure S6.  $^{13}\text{C}$  NMR spectrum of compound **12** (in DMSO- $d_6$ )

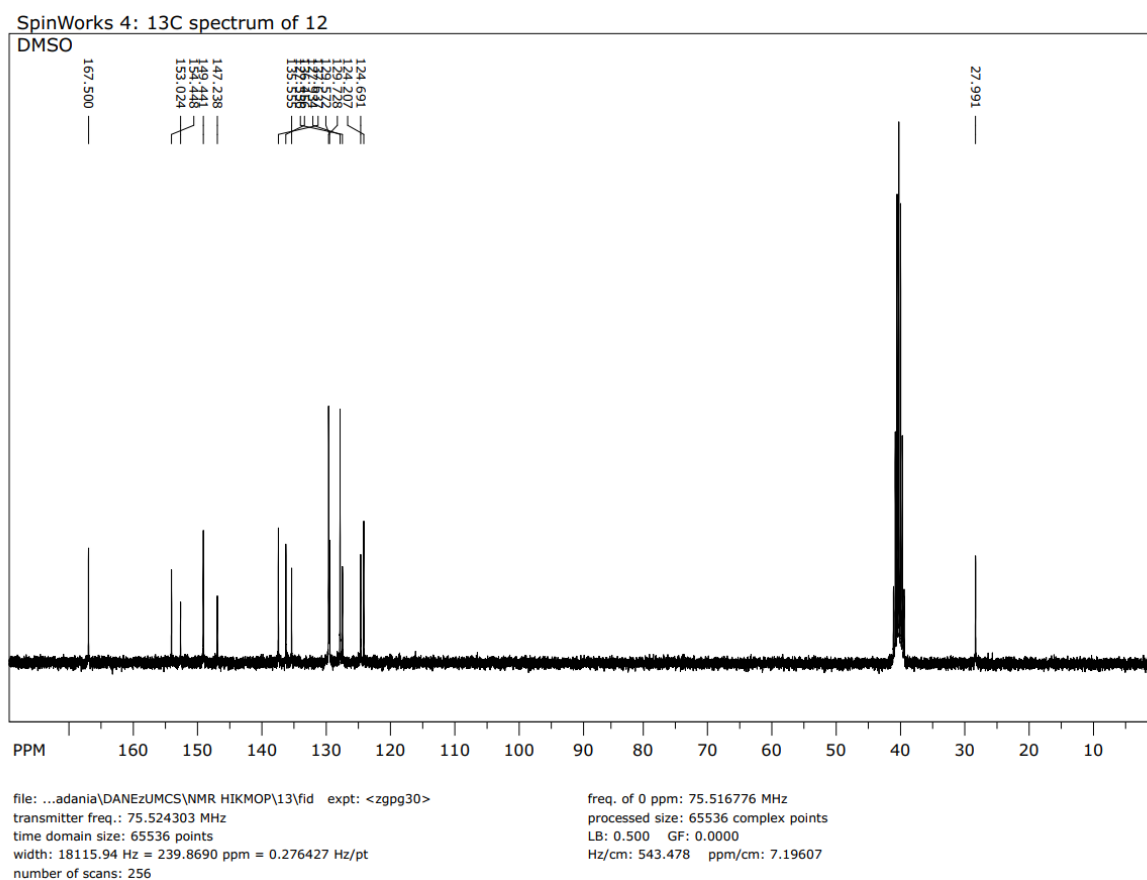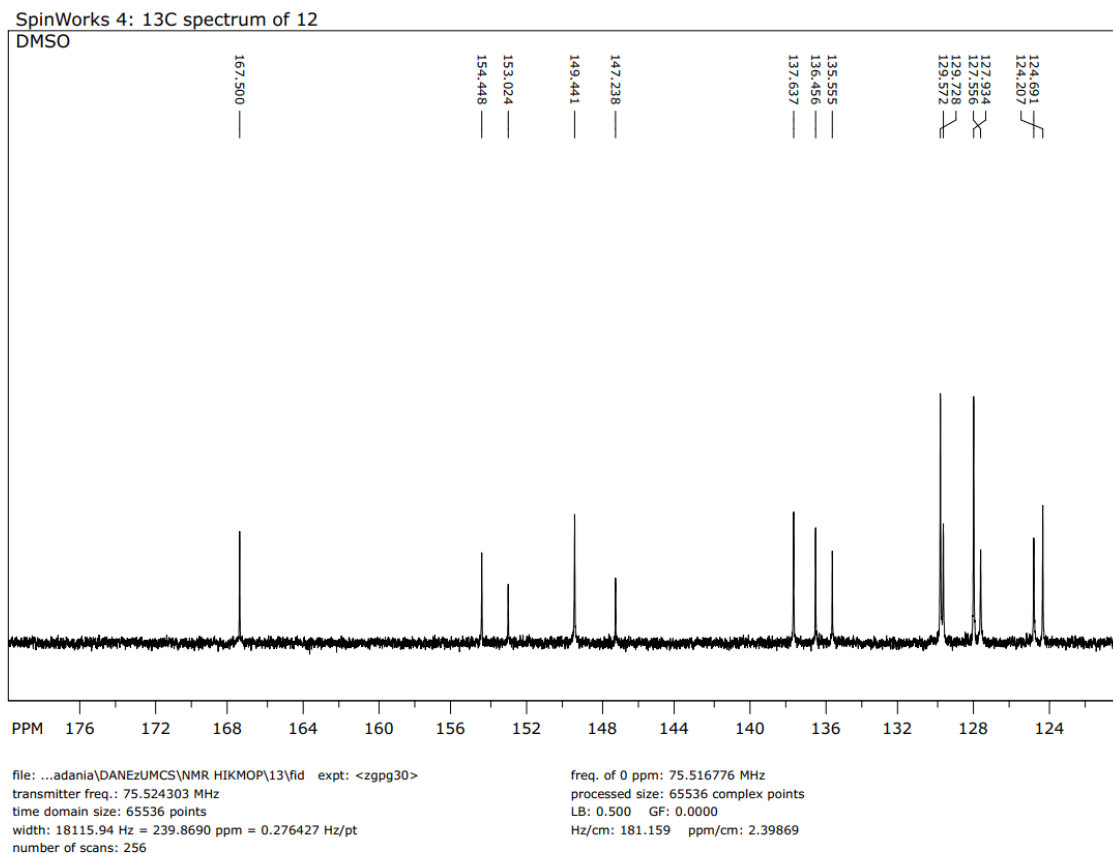



Figure S7.  $^{13}\text{C}$  NMR spectrum of compound **19** (in  $\text{DMSO-d}_6$ )

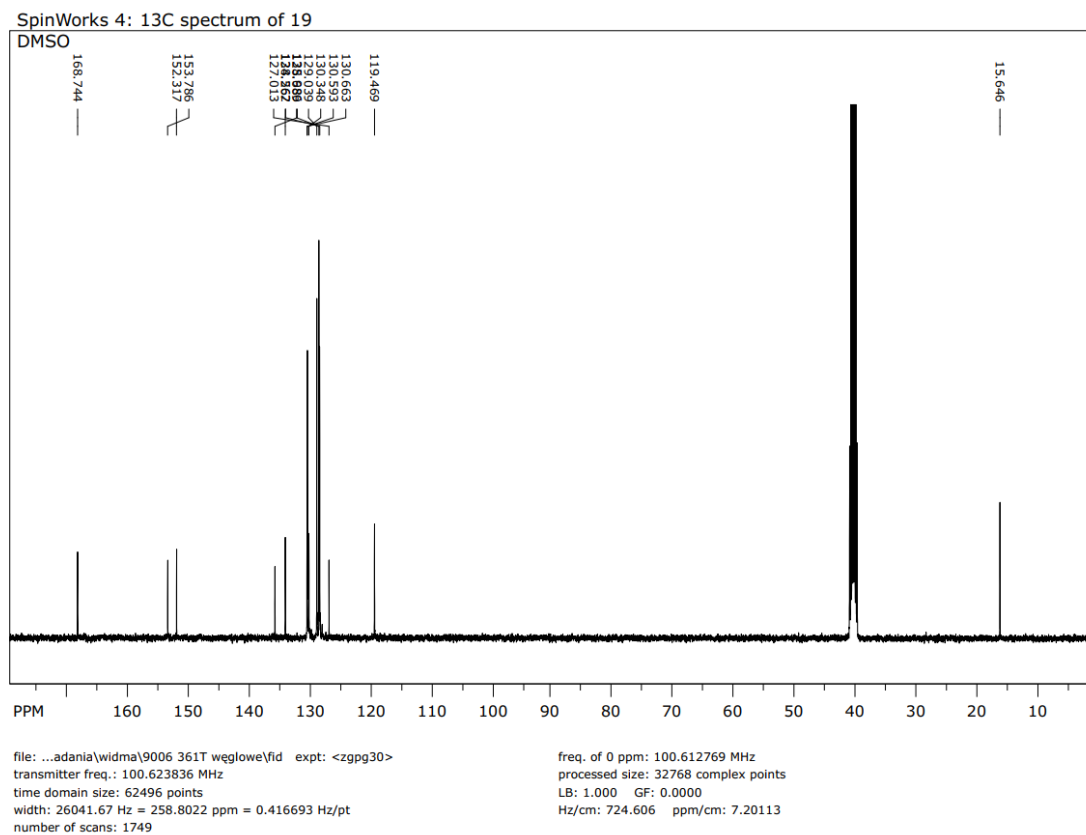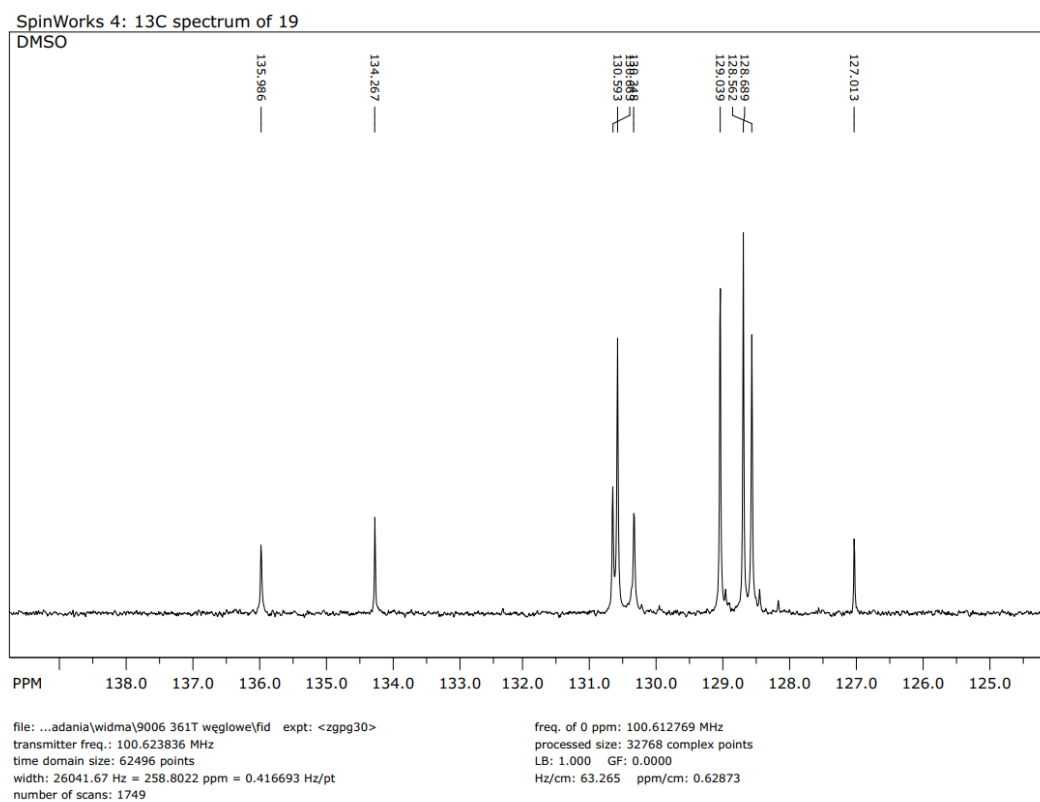

Figure S8.  $^{13}\text{C}$  NMR spectrum of compound **20** (in  $\text{DMSO-d}_6$ )

SpinWorks 4:  $^{12}\text{C}$  spectrum of 20

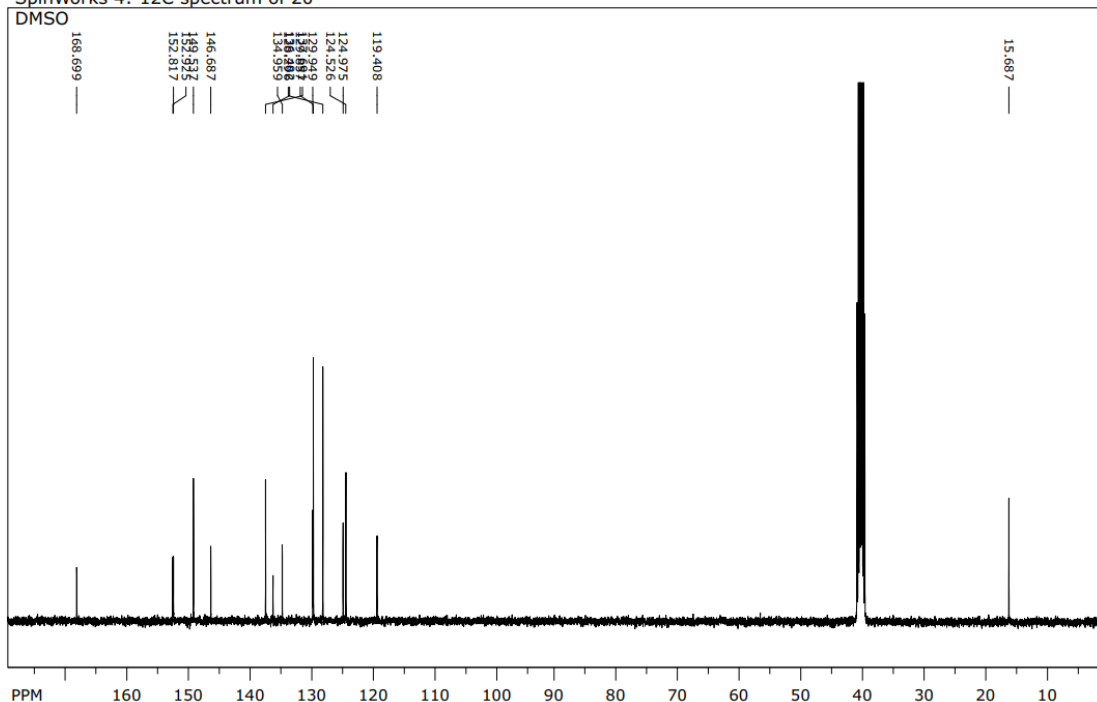

file: ...adania\widma\9002 363U weglowe\fid exp: <zpgp30>  
transmitter freq.: 100.623836 MHz  
time domain size: 62496 points  
width: 26041.67 Hz = 258.8022 ppm = 0.416693 Hz/pt  
number of scans: 2701

freq. of 0 ppm: 100.612769 MHz  
processed size: 32768 complex points  
LB: 1.000 GF: 0.0000  
Hz/cm: 724.606 ppm/cm: 7.20113

SpinWorks 4:  $^{12}\text{C}$  spectrum of 20

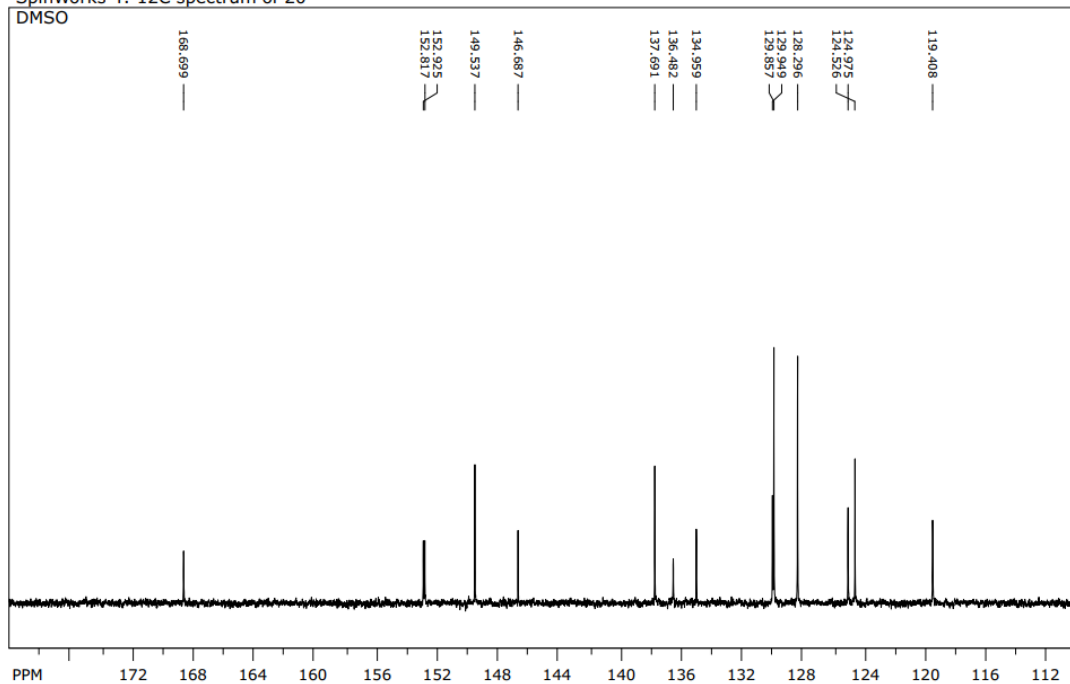

file: ...adania\widma\9002 363U weglowe\fid exp: <zpgp30>  
transmitter freq.: 100.623836 MHz  
time domain size: 62496 points  
width: 26041.67 Hz = 258.8022 ppm = 0.416693 Hz/pt  
number of scans: 2701

freq. of 0 ppm: 100.612769 MHz  
processed size: 32768 complex points  
LB: 1.000 GF: 0.0000  
Hz/cm: 282.486 ppm/cm: 2.80735

Figure S9.  $^{13}\text{C}$  NMR spectrum of compound **21** (in  $\text{DMSO-d}_6$ )

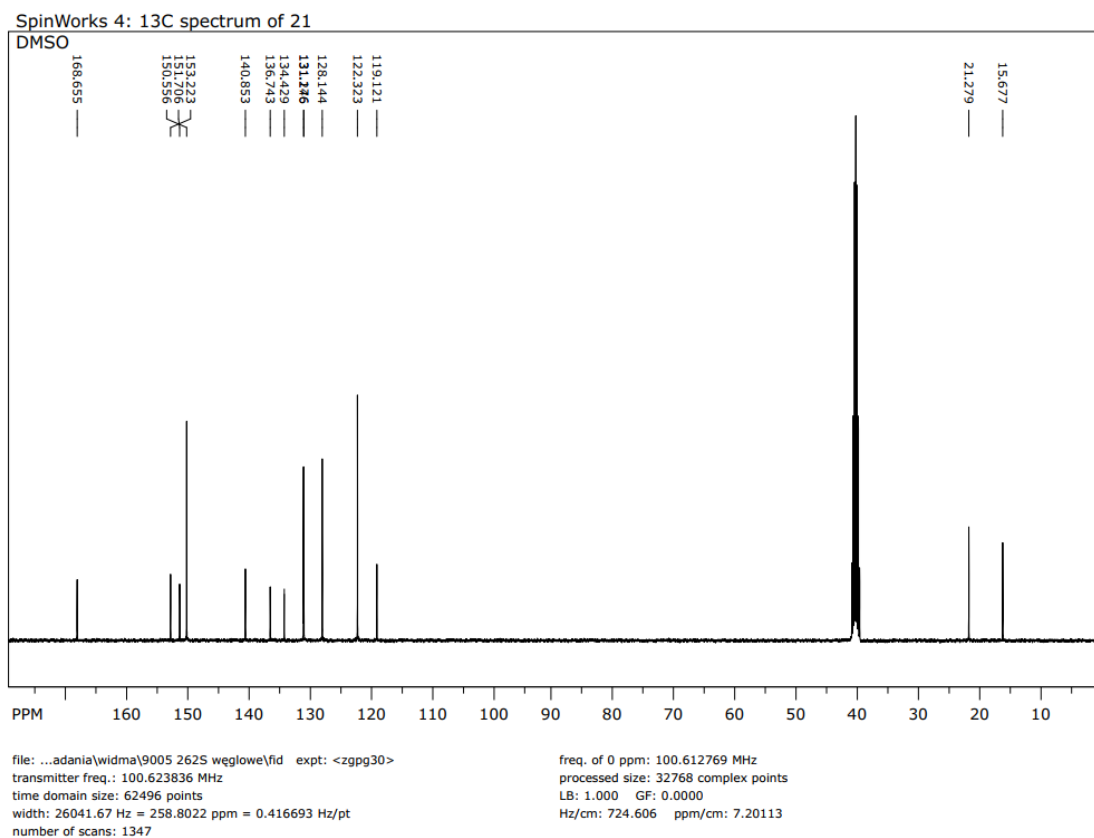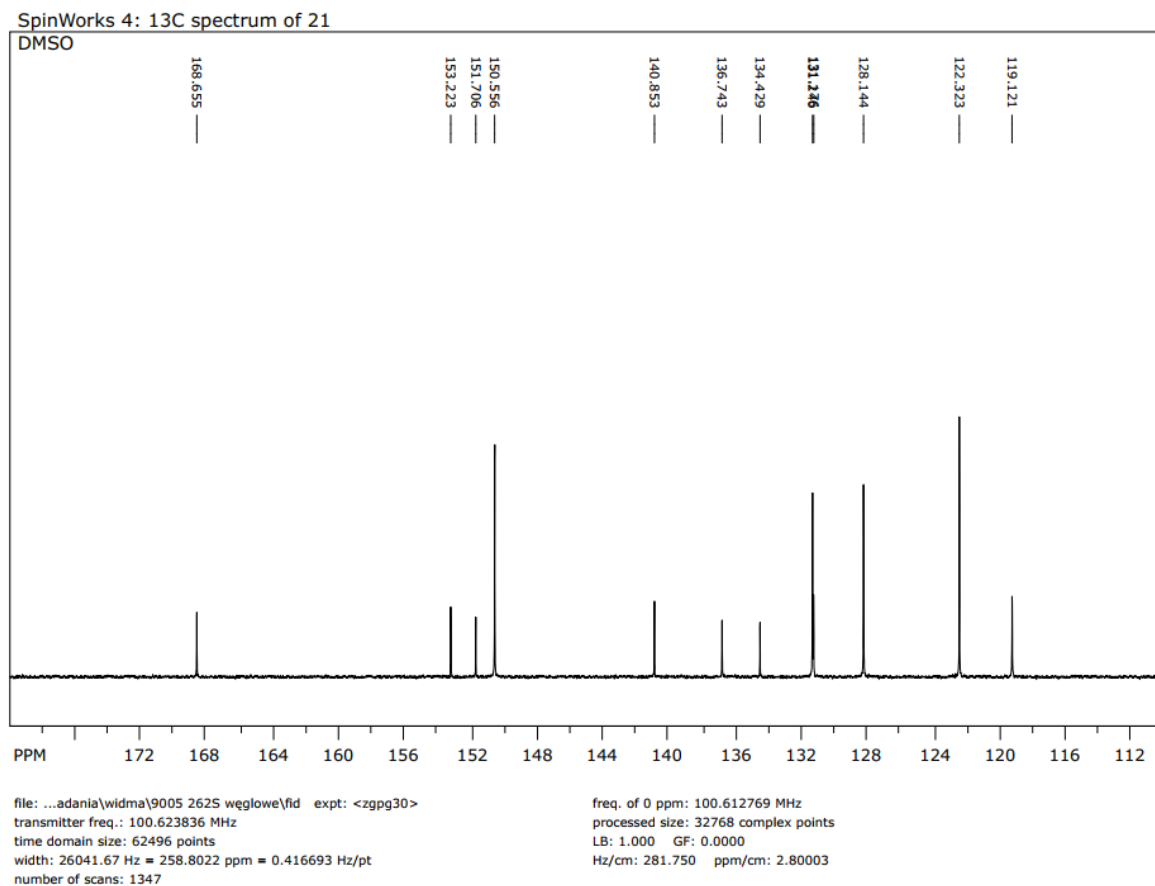

Figure S10.  $^{13}\text{C}$  NMR spectrum of compound **22** (in  $\text{DMSO-d}_6$ )

SpinWorks 4:  $^{13}\text{C}$  spectrum of 22

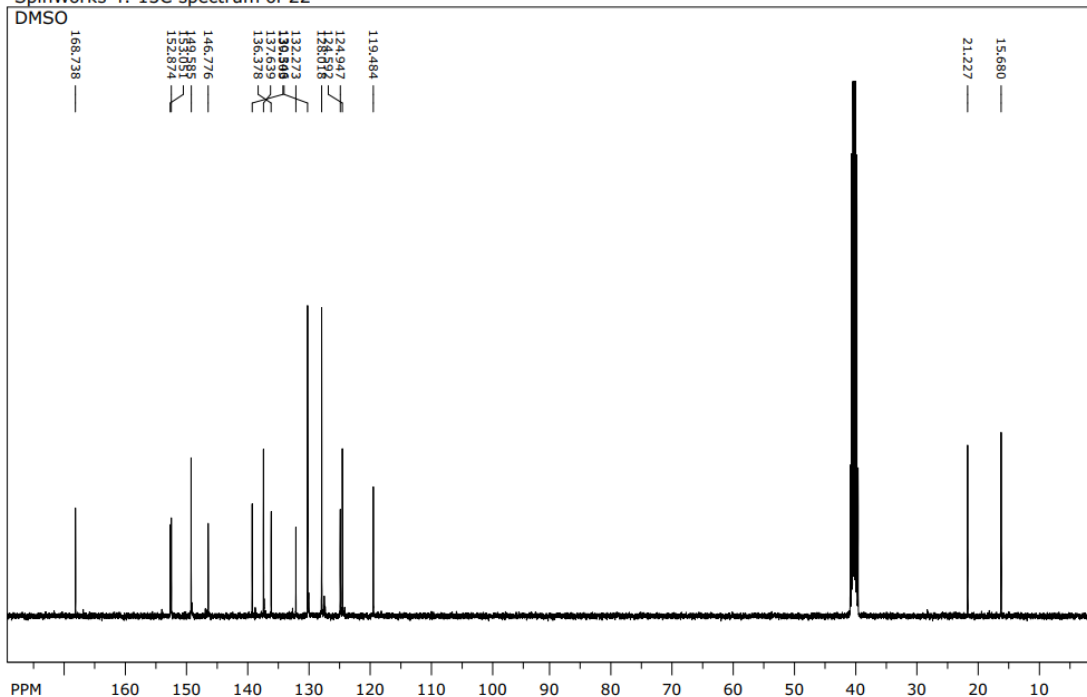

file: ...adania\widma\8997 252W weglowe\fid expt: <zpgp30>  
transmitter freq.: 100.623836 MHz  
time domain size: 62496 points  
width: 26041.67 Hz = 258.8022 ppm = 0.416693 Hz/pt  
number of scans: 1303

freq. of 0 ppm: 100.612769 MHz  
processed size: 32768 complex points  
LB: 1.000 GF: 0.0000  
Hz/cm: 724.606 ppm/cm: 7.20113

SpinWorks 4:  $^{13}\text{C}$  spectrum of 22

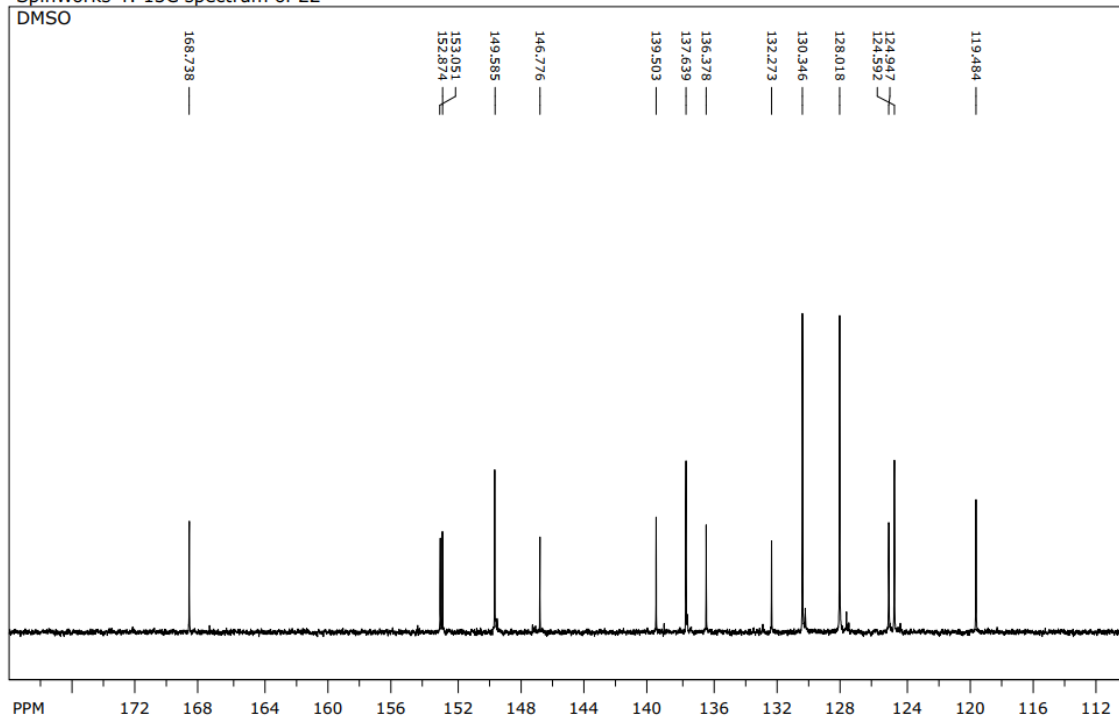

file: ...adania\widma\8997 252W weglowe\fid expt: <zpgp30>  
transmitter freq.: 100.623836 MHz  
time domain size: 62496 points  
width: 26041.67 Hz = 258.8022 ppm = 0.416693 Hz/pt  
number of scans: 1303

freq. of 0 ppm: 100.612769 MHz  
processed size: 32768 complex points  
LB: 1.000 GF: 0.0000  
Hz/cm: 281.750 ppm/cm: 2.80003

Figure S11. HRMS data of compound **12**

## Elemental Composition Report

Page 1

## Single Mass Analysis

Tolerance = 5.0 PPM / DBE: min = -1.5, max = 90.0

Element prediction: Off

Number of isotope peaks used for i-FIT = 9

Monoisotopic Mass, Even Electron Ions

175 formula(e) evaluated with 2 results within limits (all results (up to 1000) for each mass)

Elements Used:

C: 0-35   H: 0-30   N: 0-5   O: 0-10

220704\_probka\_12\_A 22 (0.240) Cm (22:24-6:8)

TOF MS ES+  
1.62e+006

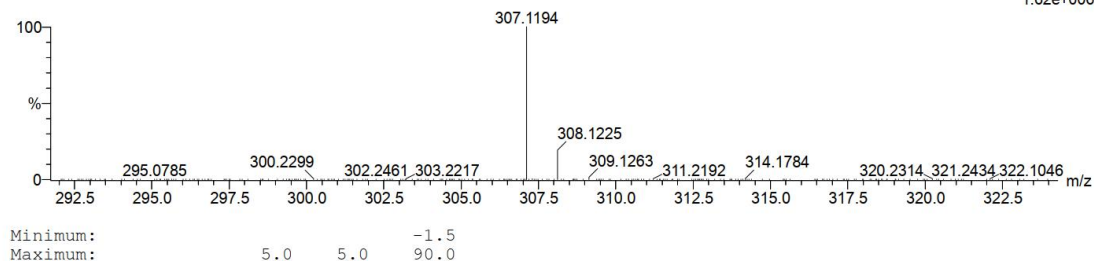

Figure S12. HRMS data of compound **19**

## Single Mass Analysis

Tolerance = 5.0 PPM / DBE: min = -1.5, max = 90.0

Element prediction: Off

Number of isotope peaks used for i-FIT = 9

**Monoisotopic Mass, Even Electron Ions**

174 formula(e) evaluated with 1 results within limits (all results (up to 1000) for each mass)

Elements Used:

C: 0-35    H: 0-30    N: 0-5    O: 0-10

220704 probka 19TA 29 (0.311) Cm (29:33-3:7)

TOF MS ES+  
4.07e+006

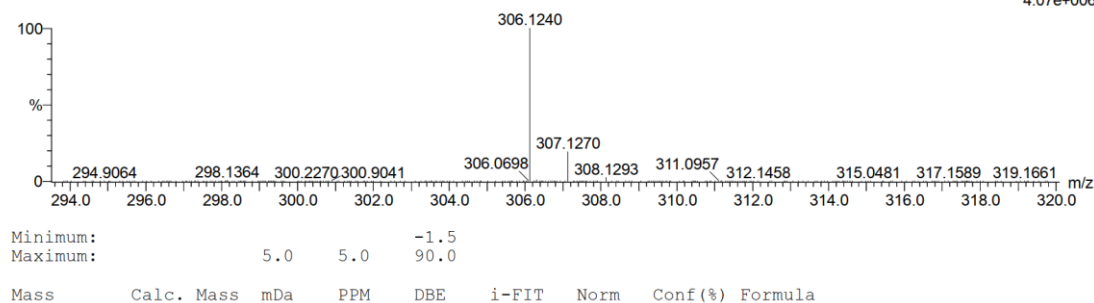

Figure S13. HRMS data of compound **20**

# Elemental Composition Report

Page 1

## Single Mass Analysis

Tolerance = 5.0 PPM / DBE: min = -1.5, max = 90.0

Element prediction: Off

Number of isotope peaks used for i-FIT = 9

Monoisotopic Mass, Even Electron Ions

175 formula(e) evaluated with 2 results within limits (all results (up to 1000) for each mass)

Elements Used:

C: 0-35 H: 0-30 N: 0-5 O: 0-10

220704\_probka\_20UA 26 (0.285) Cm (26:31-3:6)

TOF MS ES+  
4.45e+006

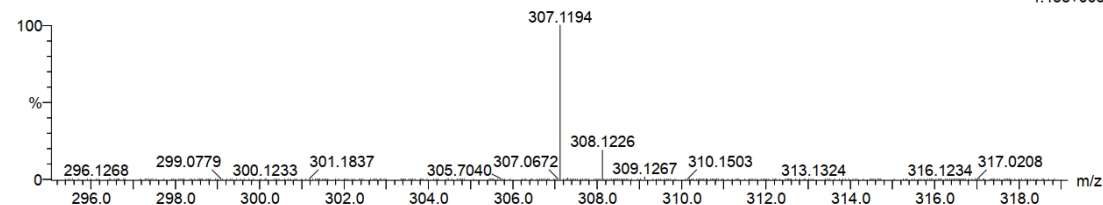

Minimum:  
Maximum:

| Mass     | Calc. Mass | mDa  | PPM  | DBE  | i-FIT  | Norm  | Conf (%) | Formula       |
|----------|------------|------|------|------|--------|-------|----------|---------------|
| 307.1194 | 307.1195   | -0.1 | -0.3 | 12.5 | 1246.6 | 0.024 | 97.67    | C17 H15 N4 O2 |
|          | 307.1182   | 1.2  | 3.9  | 7.5  | 1250.3 | 3.759 | 2.33     | C16 H19 O6    |

Figure S14. HRMS data of compound **21**

# Elemental Composition Report

Page 1

## Single Mass Analysis

Tolerance = 5.0 PPM / DBE: min = -1.5, max = 90.0

Element prediction: Off

Number of isotope peaks used for i-FIT = 9

Monoisotopic Mass, Even Electron Ions

176 formula(e) evaluated with 2 results within limits (all results (up to 1000) for each mass)

Elements Used:

C: 0-35 H: 0-30 N: 0-5 O: 0-10

220704\_probka\_21SA 24 (0.257) Cm (24:26-2:4)

TOF MS ES+  
1.73e+006

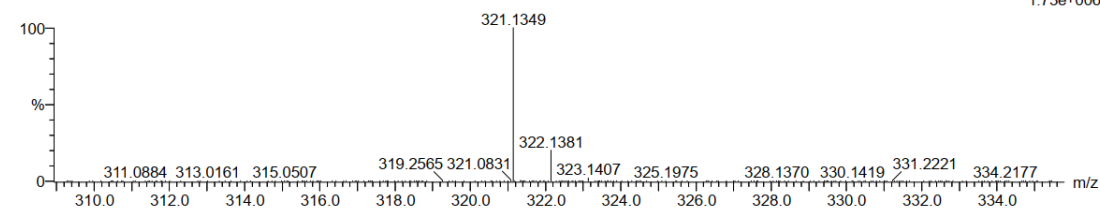

Minimum:  
Maximum:

| Mass     | Calc. Mass | mDa  | PPM  | DBE  | i-FIT | Norm  | Conf (%) | Formula       |
|----------|------------|------|------|------|-------|-------|----------|---------------|
| 321.1349 | 321.1352   | -0.3 | -0.9 | 12.5 | 796.7 | 0.019 | 98.12    | C18 H17 N4 O2 |
|          | 321.1338   | 1.1  | 3.4  | 7.5  | 800.7 | 3.976 | 1.88     | C17 H21 O6    |

Figure S15. HRMS data of compound **22**

# Elemental Composition Report

Page 1

## Single Mass Analysis

Tolerance = 5.0 PPM / DBE: min = -1.5, max = 90.0

Element prediction: Off

Number of isotope peaks used for i-FIT = 9

Monoisotopic Mass, Even Electron Ions

176 formula(e) evaluated with 2 results within limits (all results (up to 1000) for each mass)

Elements Used:

C: 0-35 H: 0-30 N: 0-5 O: 0-10

220704\_probka\_22WA 25 (0.277) Cm (25.27-6.8)

TOF MS ES+  
1.02e+006

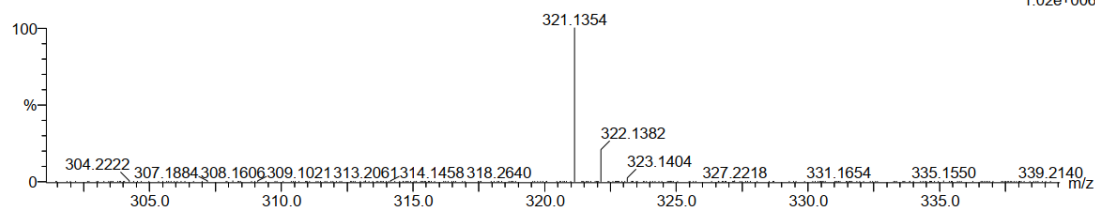

Minimum: -1.5  
Maximum: 5.0 5.0 90.0

| Mass     | Calc. Mass | mDa | PPM | DBE  | i-FIT | Norm  | Conf(%) | Formula       |
|----------|------------|-----|-----|------|-------|-------|---------|---------------|
| 321.1354 | 321.1352   | 0.2 | 0.6 | 12.5 | 635.2 | 0.015 | 98.55   | C18 H17 N4 O2 |
|          | 321.1338   | 1.6 | 5.0 | 7.5  | 639.5 | 4.232 | 1.45    | C17 H21 O6    |

Figure S16. HPLC data of **12\***

2022-07-08 12:21:12 Page 1 / 1

# SHIMADZU LabSolutions Analysis Report

## <Sample Information>

|                  |                       |              |                        |
|------------------|-----------------------|--------------|------------------------|
| Sample Name      | : 12M                 | Sample Type  | : Unknown              |
| Sample ID        | :                     |              |                        |
| Data Filename    | : 12M.lcd             |              |                        |
| Method Filename  | : metoda.lcm          |              |                        |
| Batch Filename   | : batch.lcb           |              |                        |
| Vial #           | : 0-6                 |              |                        |
| Injection Volume | : 10 uL               |              |                        |
| Date Acquired    | : 2022-07-08 10:11:18 | Acquired by  | : System Administrator |
| Date Processed   | : 2022-07-08 12:20:47 | Processed by | : System Administrator |

## <Chromatogram>

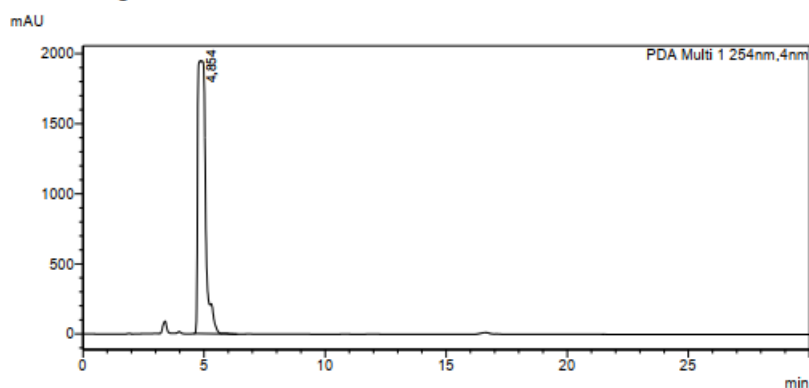

| Peak Table |           |          |         |       |      |      |      |
|------------|-----------|----------|---------|-------|------|------|------|
| Peak#      | Ret. Time | Area     | Height  | Conc. | Unit | Mark | Name |
| 1          | 4.824     | 43943817 | 1943964 | 0.000 |      | M    |      |
| Total      |           | 43943817 | 1943964 |       |      |      |      |

\*Chromatograph Shimadzu (pump: LC30AD Nexera X2, autosampler: SIL30AC Nexera X2, PDA detector: SPDM20A, thermostat: CTO20AC), mobile phase: MeOH/ H<sub>2</sub>O/FA (formic acid) 50/50/0.1 (v/v/v). stationary phase: Kinetex C18 2.6 µm 150 x 4.6 mm, mobile phase flow: 0.8 mL / min, temp: 20°C, detection: PDA (channel 1: 254 nm + full spectrum in the range 190-800 nm).



Figure S17. HPLC data of **19**\*

2022-07-06 17:14:32 Page 1 / 1

**SHIMADZU**  
**LabSolutions** Analysis Report

<Sample Information>

|                  |                       |              |                        |
|------------------|-----------------------|--------------|------------------------|
| Sample Name      | : 19T                 | Sample Type  | : Unknown              |
| Sample ID        | :                     |              |                        |
| Data Filename    | : 19T.lcd             |              |                        |
| Method Filename  | : metoda.lcm          |              |                        |
| Batch Filename   | : batch.lcb           |              |                        |
| Vial #           | : 0-2                 |              |                        |
| Injection Volume | : 10 uL               |              |                        |
| Date Acquired    | : 2022-07-06 14:32:30 | Acquired by  | : System Administrator |
| Date Processed   | : 2022-07-06 17:10:58 | Processed by | : System Administrator |

<Chromatogram>

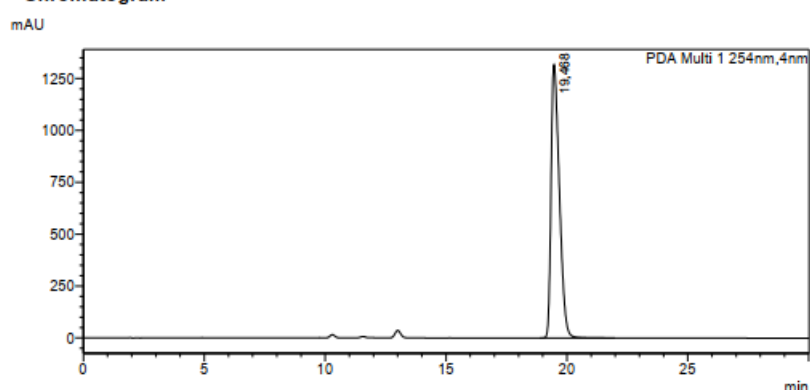

Peak Table

| Peak# | Ret. time | Area     | Height  | Conc. | Unit | Mark | Name |
|-------|-----------|----------|---------|-------|------|------|------|
| 1     | 19.468    | 31530873 | 1317100 | 0.000 |      |      |      |
| Total |           | 31530873 | 1317100 |       |      |      |      |

\*Chromatograph Shimadzu (pump: LC30AD Nexera X2, autosampler: SIL30AC Nexera X2, PDA detector: SPDM20A, thermostat: CTO20AC), mobile phase: MeOH/ H<sub>2</sub>O/FA (formic acid) 50/50/0.1 (v/v/v). stationary phase: Kinetex C18 2.6 µm 150 x 4.6 mm, mobile phase flow: 0.8 mL / min, temp: 20°C, detection: PDA (channel 1: 254 nm + full spectrum in the range 190-800 nm).

Figure S18. HPLC data of **20\***

2022-07-06 17:17:29 Page 1 / 1

# SHIMADZU LabSolutions Analysis Report

## <Sample Information>

|                  |                       |              |                        |
|------------------|-----------------------|--------------|------------------------|
| Sample Name      | : 20U                 | Sample Type  | : Unknown              |
| Sample ID        | :                     | Acquired by  | : System Administrator |
| Data Filename    | : 20U.lcd             | Processed by | : System Administrator |
| Method Filename  | : metoda.lcm          |              |                        |
| Batch Filename   | : batch.lcb           |              |                        |
| Vial #           | : 0-3                 |              |                        |
| Injection Volume | : 10 uL               |              |                        |
| Date Acquired    | : 2022-07-06 15:03:09 |              |                        |
| Date Processed   | : 2022-07-06 17:15:16 |              |                        |

## <Chromatogram>

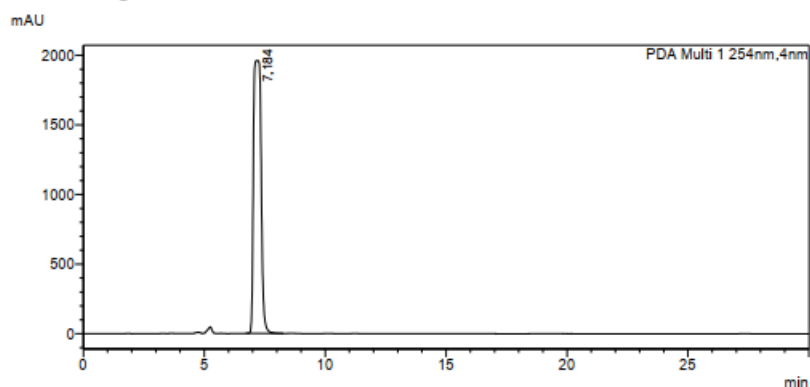

Peak Table

| Peak# | Ret. Time | Area     | Height  | Conc. | Unit | Mark | Name |
|-------|-----------|----------|---------|-------|------|------|------|
| 1     | 7.184     | 43916974 | 1979997 | 0.000 |      | M    |      |
| Total |           | 43916974 | 1979997 |       |      |      |      |

\*Chromatograph Shimadzu (pump: LC30AD Nexera X2, autosampler: SIL30AC Nexera X2, PDA detector: SPD20A, thermostat: CTO20AC), mobile phase: MeOH/ H<sub>2</sub>O/FA (formic acid) 50/50/0.1 (v/v/v). stationary phase: Kinetex C18 2.6 µm 150 x 4.6 mm, mobile phase flow: 0.8 mL / min, temp: 20°C, detection: PDA (channel 1: 254 nm + full spectrum in the range 190-800 nm).

Figure S19. HPLC data of **21**\*

2022-07-06 17:15:32 Page 1 / 1

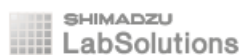

## Analysis Report

### <Sample Information>

|                  |                       |              |                        |
|------------------|-----------------------|--------------|------------------------|
| Sample Name      | : 21S                 | Sample Type  | : Unknown              |
| Sample ID        | :                     | Acquired by  | : System Administrator |
| Data Filename    | : 21S.lcd             | Processed by | : System Administrator |
| Method Filename  | : metoda.lcm          |              |                        |
| Batch Filename   | : batch.lcb           |              |                        |
| Vial #           | : 0-4                 |              |                        |
| Injection Volume | : 10 uL               |              |                        |
| Date Acquired    | : 2022-07-06 15:33:48 |              |                        |
| Date Processed   | : 2022-07-06 17:10:42 |              |                        |

### <Chromatogram>

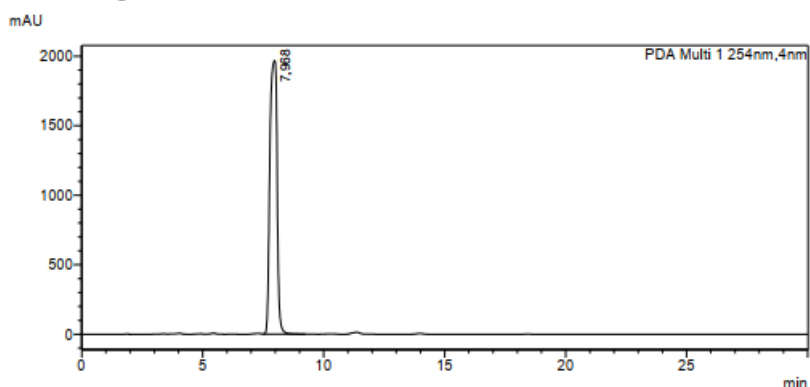

| Peak Table |           |          |         |       |      |      |
|------------|-----------|----------|---------|-------|------|------|
| Peak#      | Ret. time | Area     | Height  | Conc. | Unit | Name |
| 1          | 7.968     | 40736489 | 1965204 | 0.000 | M    |      |
| Total      |           | 40736489 | 1965204 |       |      |      |

\*Chromatograph Shimadzu (pump: LC30AD Nexera X2, autosampler: SIL30AC Nexera X2, PDA detector: SPDM20A, thermostat: CTO20AC), mobile phase: MeOH/ H<sub>2</sub>O/FA (formic acid) 50/50/0.1 (v/v/v). stationary phase: Kinetex C18 2.6 µm 150 x 4.6 mm, mobile phase flow: 0.8 mL / min, temp: 20°C, detection: PDA (channel 1: 254 nm + full spectrum in the range 190-800 nm).

Figure S20. HPLC data of **22\***

2022-07-06 17:15:48 Page 1 / 1

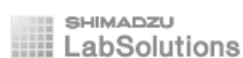

## Analysis Report

### <Sample Information>

|                  |                       |              |                        |
|------------------|-----------------------|--------------|------------------------|
| Sample Name      | : 22W                 | Sample Type  | : Unknown              |
| Sample ID        | :                     | Acquired by  | : System Administrator |
| Data Filename    | : 22W.lcd             | Processed by | : System Administrator |
| Method Filename  | : metoda.lcm          |              |                        |
| Batch Filename   | : batch.lcb           |              |                        |
| Vial #           | : 0-5                 |              |                        |
| Injection Volume | : 10 uL               |              |                        |
| Date Acquired    | : 2022-07-06 16:04:27 |              |                        |
| Date Processed   | : 2022-07-06 17:10:30 |              |                        |

### <Chromatogram>

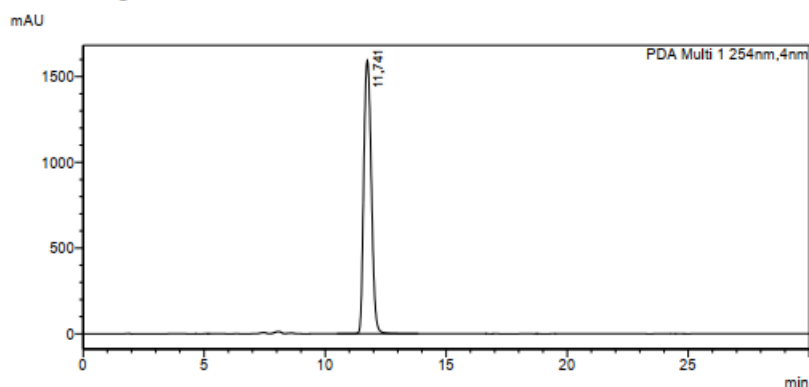

| PDA Ch1 254nm |           | Peak Table |         |       |      |      |
|---------------|-----------|------------|---------|-------|------|------|
| Peak#         | Ret. time | Area       | Height  | Conc. | Unit | Name |
| 1             | 11.741    | 34738657   | 1592879 | 0.000 |      |      |
| Total         |           | 34738657   | 1592879 |       |      |      |

\*Chromatograph Shimadzu (pump: LC30AD Nexera X2, autosampler: SIL30AC Nexera X2, PDA detector: SPD20A, thermostat: CTO20AC), mobile phase: MeOH/ H<sub>2</sub>O/FA (formic acid) 50/50/0.1 (v/v/v). stationary phase: Kinetex C18 2.6 µm 150 x 4.6 mm, mobile phase flow: 0.8 mL / min, temp: 20°C, detection: PDA (channel 1: 254 nm + full spectrum in the range 190-800 nm).

Figure S21. Cell apoptosis of compounds **9-21** measured by flow cytometry using annexin V and PI. *Peripheral Blood Mononuclear Cells (PBMC)* were exposed to varying concentrations of test compounds (**9-20**). Untreated cells and cells exposed to DMSO (the highest percentage that are used together with compounds) were used as negative control. In each dot plot quadrant Q1: shows necrotic cells (Annexin V<sup>-</sup>/PI<sup>+</sup>); Q2: late apoptotic cells (Annexin V<sup>+</sup>/PI<sup>+</sup>); Q3: early apoptotic cells (Annexin V<sup>+</sup>/PI<sup>-</sup>) and Q4: shows viable cells (Annexin V<sup>-</sup>/PI<sup>-</sup>).

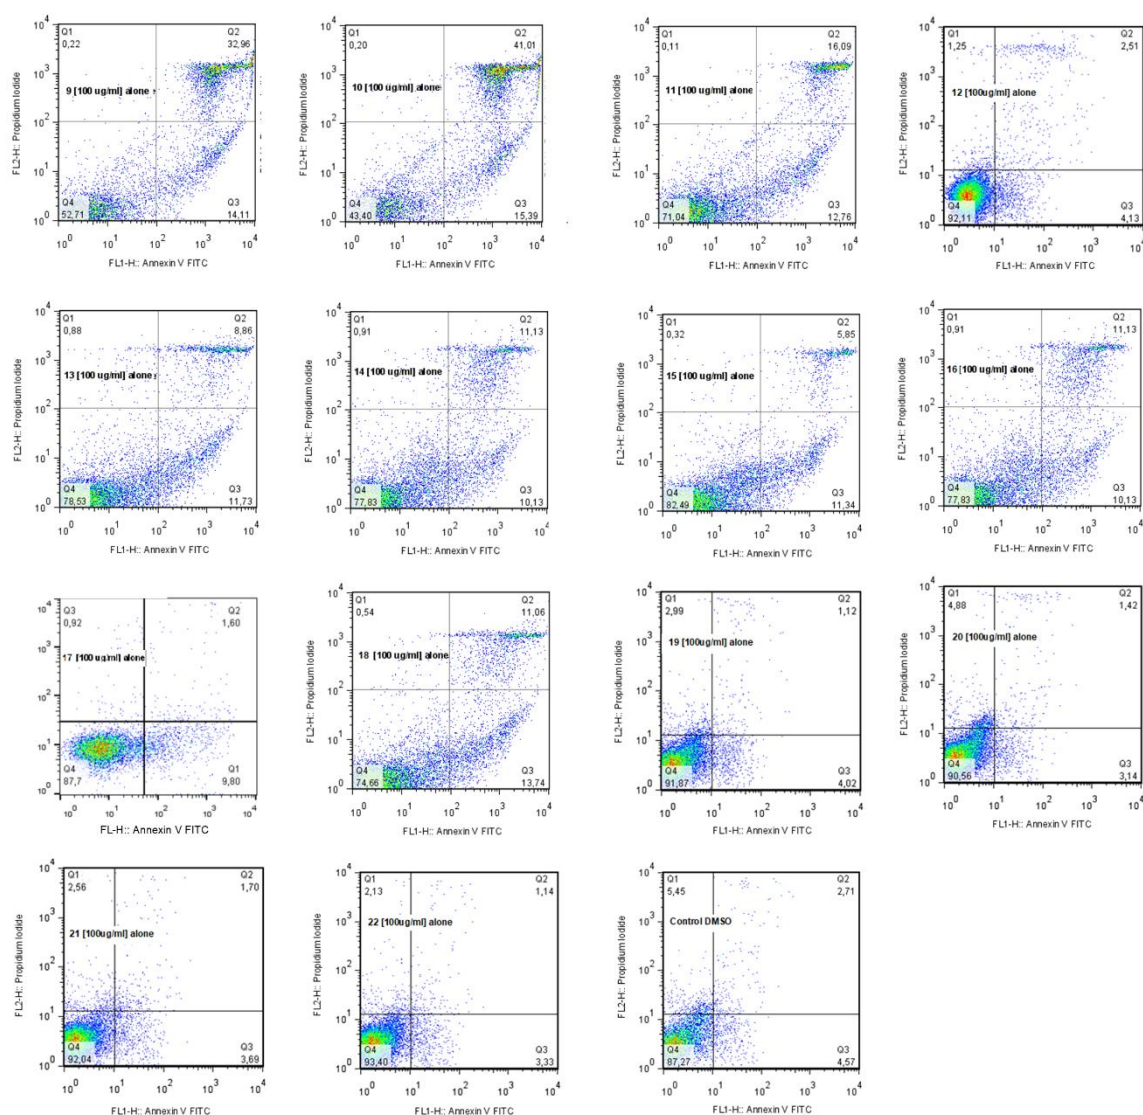

Supplement: s1 [file s1]
